# Supplementary material for: Right Ventricular Remodeling and Wall Shear Stress; 4D Flow Analysis in Repaired Tetralogy of Fallot Undergoing Transcatheter Pulmonary Valve Implantation
Source: Research Square preprint supplement (doi:10.21203/rs.3.rs-6741089/v1), 2025-06-24
Supplement: Supplementary file 1 [file 05d832688f54522fb07ad146.pdf]

## Supplemental Materials

**Fig. S1** Flow diagram of present study. Patients who were not performed 4D flow MRI were excluded. Thirty patients underwent 4D flow MRI post-TPVI 3 months, and among them 15 patients underwent 4D flow MRI post-TPVI 1 year.

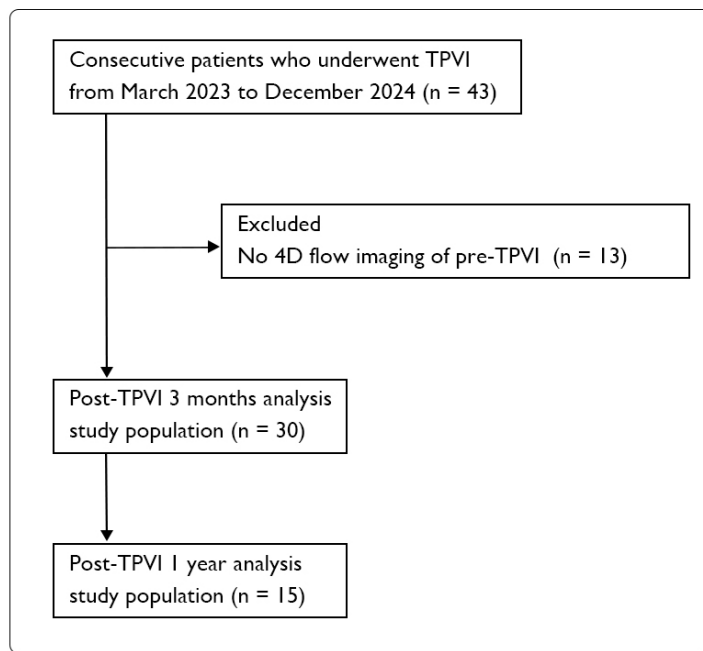

**Fig. S2** Measurement of regurgitant fraction and MPA cross-sectional area using 4D flow MRI. (A) The regurgitant fraction obtained using 4D flow (RF-4D) was calculated as the ratio of the average backward flow volume to the average forward flow volume across the 5 cross-sections. (B) The cross-sectional area of the pulmonary artery was measured based on the blood flow signal in the 4D flow phase contrast images and average of area measurements from 5 slices was used for analysis.

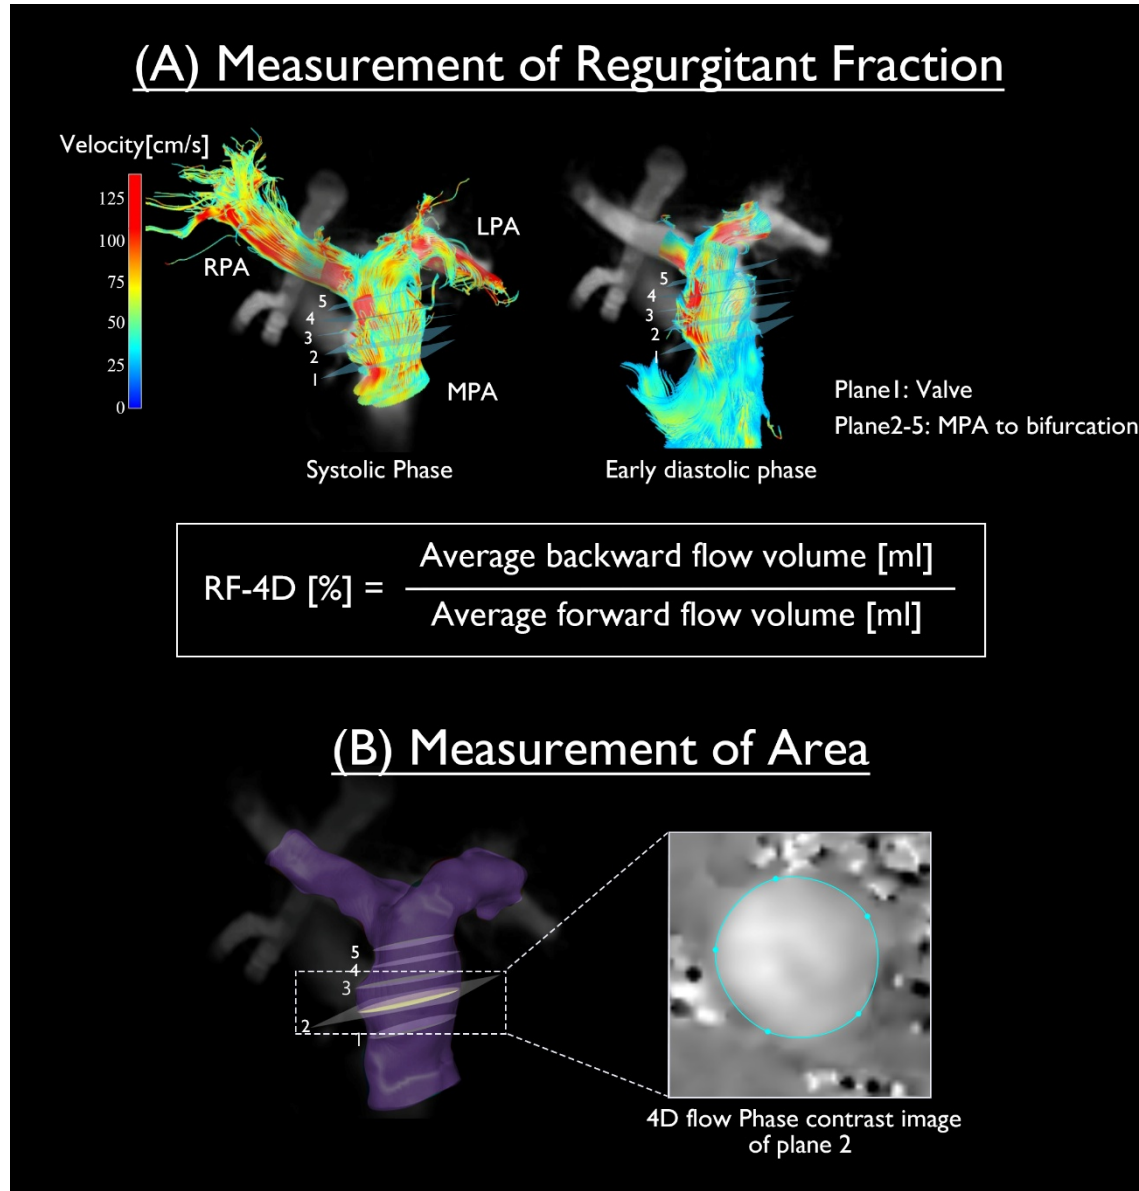

**Fig. S3** WSS in cardiac cycles was compared between 3months post-TPVI and 1 year post-TPVI. No significant differences were found in either systolic or early diastolic phase.

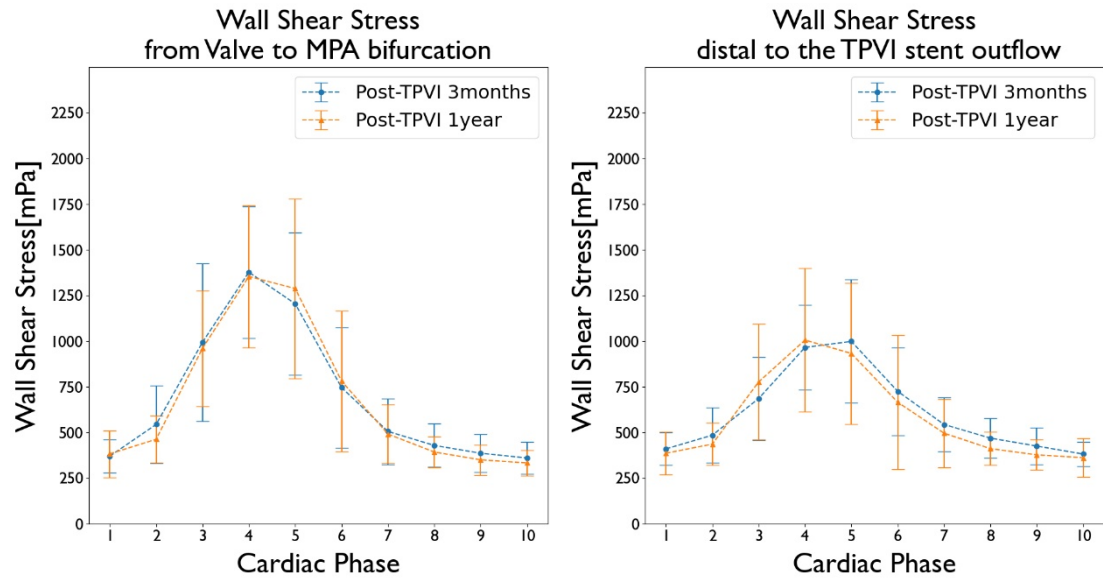

**Table S1.** Correlation between the average cross-sectional area of the main pulmonary artery and clinical and CMR data

| Pre-operative<br>parameters                                                                      | Average Area of<br>Pulmonary Artery<br>[mm <sup>2</sup> ] |         |
|--------------------------------------------------------------------------------------------------|-----------------------------------------------------------|---------|
|                                                                                                  | r                                                         | p       |
| Age                                                                                              | 0.173                                                     | 0.361   |
| BNP(pg/ml)                                                                                       | -0.031                                                    | 0.869   |
| RF-4D(%)                                                                                         | 0.514                                                     | 0.003   |
| RVEDVi(ml)                                                                                       | 0.313                                                     | 0.092   |
| RVESVi(ml)                                                                                       | 0.206                                                     | 0.275   |
| RVEF(%)                                                                                          | 0.154                                                     | 0.416   |
| CO-RV(l/min)                                                                                     | 0.142                                                     | 0.453   |
| LVEDVi(ml)                                                                                       | -0.466                                                    | 0.009   |
| LVESVi(ml)                                                                                       | -0.412                                                    | 0.024   |
| LVEF(%)                                                                                          | 0.16                                                      | 0.397   |
| CO-LV(l/min)                                                                                     | 0.012                                                     | 0.949   |
| RVSP(mmHg)                                                                                       | 0.073                                                     | 0.701   |
| RVEDP(mmHg)                                                                                      | -0.123                                                    | 0.518   |
| mPAP(mmHg)                                                                                       | -0.025                                                    | 0.897   |
| Systolic mean velocity(cm/s)*                                                                    | -0.68                                                     | < 0.001 |
| Diastolic mean velocity(cm/s)*                                                                   | -0.312                                                    | 0.093   |
| Systolic WSS(mPa)                                                                                | -0.545                                                    | 0.002   |
| Diastolic WSS(mPa)                                                                               | -0.456                                                    | 0.011   |
| *mean velocity indicates the mean blood flow velocity<br>of multiple slices measured in 4D flow. |                                                           |         |
